# Supplementary material for: Declines in the Mekong’s Megadiverse Larval Fish Assemblages: Implications for Sustainable Development
Source: MDPI journal article supplement (doi:10.3390/su151813535), 2023-09-11
Supplement: s1 [file s1]

# Supplementary Materials

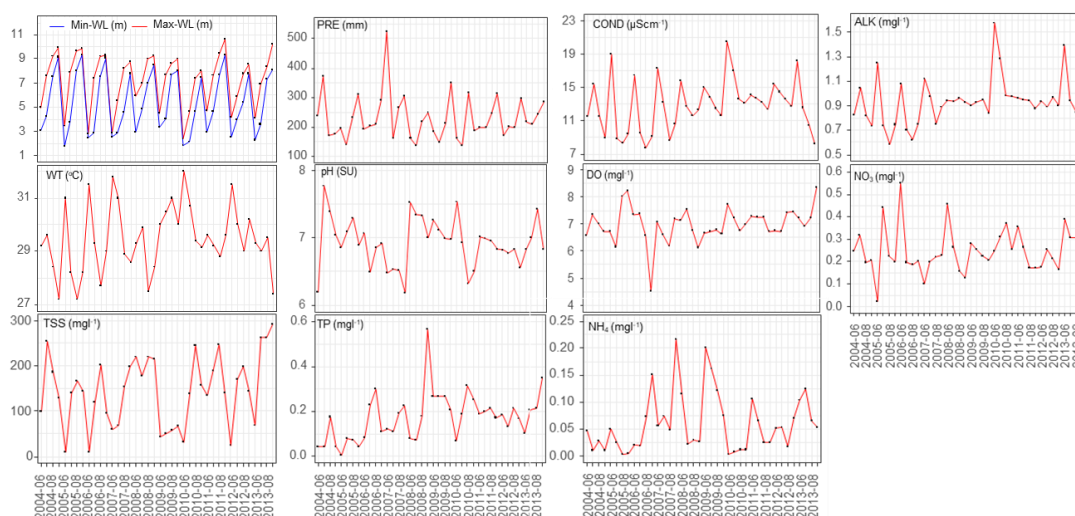

**Figure S1.** Time series plot of predictors used in this study. For abbreviations in the plot, see Table 1.

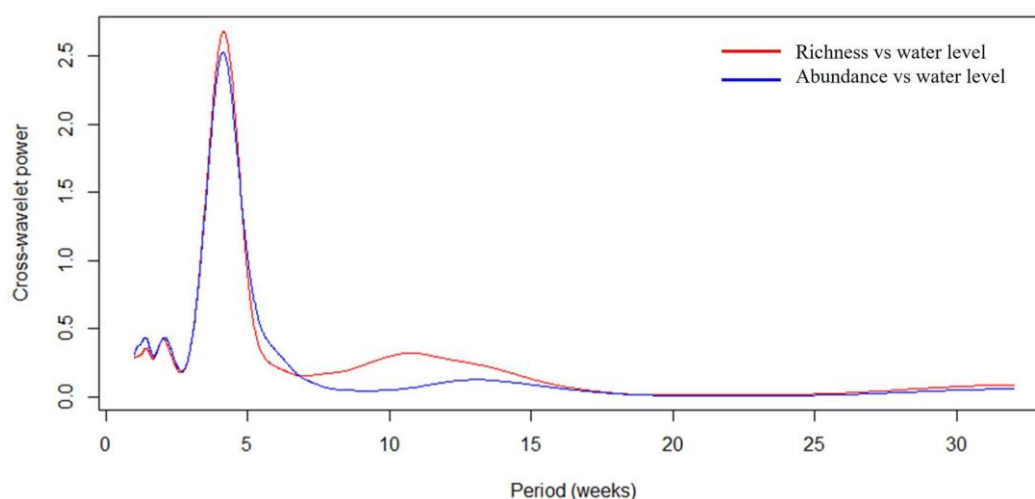

**Figure S2.** Average cross-wavelet power: richness and abundance vs. water series derived from Figure 5a (lower panel) and 5b (lower panel).

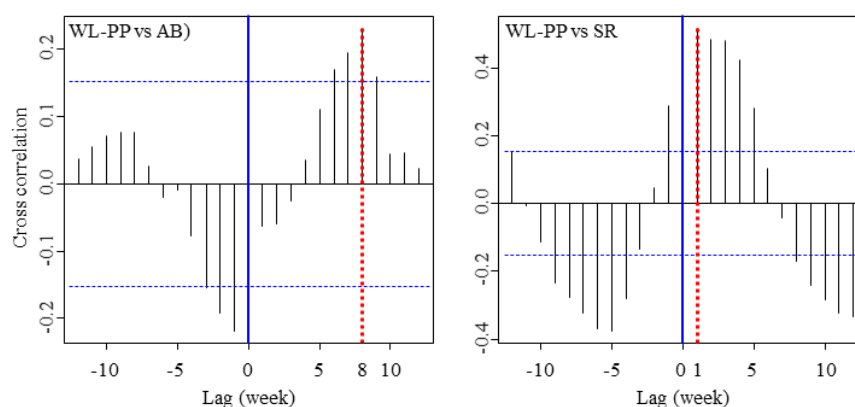

**Figure S3.** Cross-correlation plots between weekly water levels in Phnom Penh (WL-PP) and weekly larval abundance (AB) and richness (SR). The blue solid vertical line shows lag zero. Values of the vertical line above and below horizontal dashed lines represent significantly positive and negative correlation coefficients. The red vertical dotted line represents the highest correlation coefficient between the two-time series, covering between June and September from 2004 to 2013.

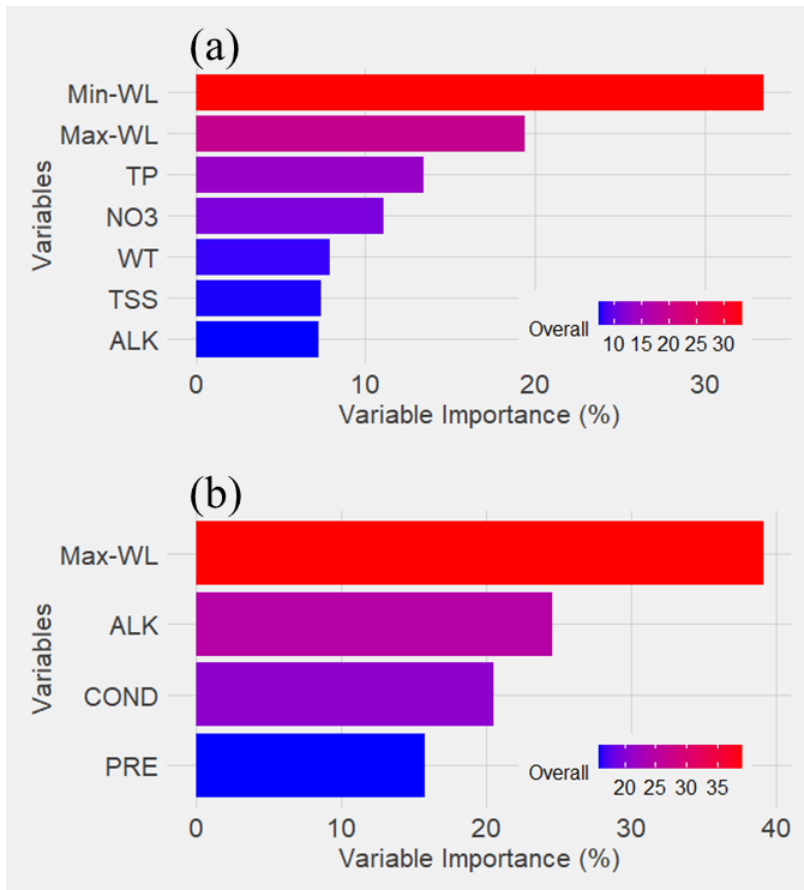

**Figure S4.** Relative contribution of predictive variables to (a) abundance and (b) richness. In the bar plots, red color represents strong contribution and blue weak. For abbreviations in the plot, see Table 1.

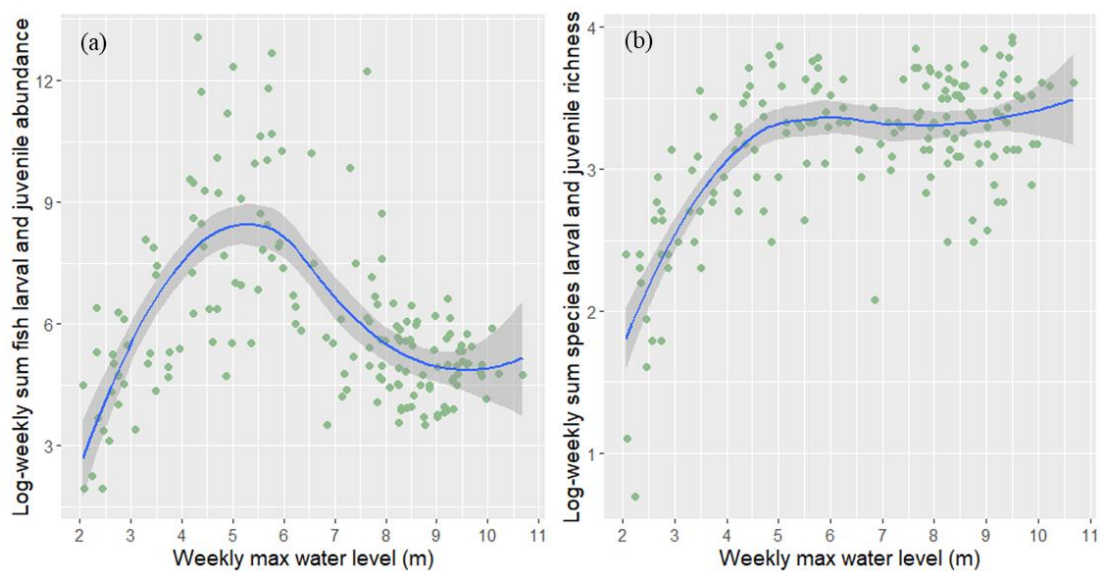

**Figure S5.** Loess plot of relationship between weekly log-transformed maximum water levels and species larval and juvenile (a) abundance and (b) richness in the Mekong River in Phnom Penh.
