# Supplementary material for: Declines in the Mekong’s Megadiverse Larval Fish Assemblages: Implications for Sustainable Development
Source: MDPI journal article supplement (doi:10.3390/su151813535), 2023-09-11
Supplement: s1 [file s1]

Archive with 1 entries (1 files):
- sustainability-2380481-supplementary.pdf
